# Supplementary material for: Validating an Assessment Tool for Oral Health and Oral Care Procedures Performed by Healthcare Workers for Older Residents in Long-Term Care Institutions
Source: MDPI journal article supplement (doi:10.3390/healthcare12050558), 2024-02-28
Supplement: s1 [file s1]

Table S1. Expert review results for relevancy check and comments

| Question No. | Item Questions                                                                                                                                         | Interpretation | Recommendation                                                                                                                                                             |
|--------------|--------------------------------------------------------------------------------------------------------------------------------------------------------|----------------|----------------------------------------------------------------------------------------------------------------------------------------------------------------------------|
| OHAQ1        | Lips:<br>redness/whiteness/pain/dryness/crusting/<br>chapped/enlargement/irregularities/ulcer/<br>blister/bleeding/Not applicable                      | Relevant       | <ul style="list-style-type: none"> <li>Change “whiteness” to “pale”</li> <li>Delete “not applicable”</li> </ul>                                                            |
| OHAQ2        | Tongue:<br>redness/pale/discoloration/pain/dryness/<br>smoothness/enlargement/irregularities/<br>ulcer/blister/bleeding/Not applicable                 | Relevant       | <ul style="list-style-type: none"> <li>Change “whiteness” to “pale”</li> <li>Delete “not applicable”</li> </ul>                                                            |
| OHAQ3        | Oral mucosa:<br>redness/pale/pain/dryness/bleeding/ulcer<br>/outgrowth/not applicable                                                                  | Relevant       | <ul style="list-style-type: none"> <li>Change “whiteness” to “pale”</li> <li>Delete “not applicable”</li> </ul>                                                            |
| OHAQ4        | Gum:<br>redness/pale/pain/dryness/bleeding/ulcer<br>/enlargement/ not applicable                                                                       | Relevant       | <ul style="list-style-type: none"> <li>Change “whiteness” to “pale”</li> <li>Delete “not applicable”</li> </ul>                                                            |
| OHAQ5        | Tooth: count (<20/<10/nil)/<br>tartar/deposits/plaque/looseness/<br>discomfort/pain/cavity/caries/severe<br>wear/failing restoration/ not applicable   | Relevant       | <ul style="list-style-type: none"> <li>Added “&gt;20”</li> <li>Delete “not applicable”</li> </ul>                                                                          |
| OHAQ6        | Denture(s): tartar/deposits/plaque/severe<br>wear/looseness/discomfort/pain/poor<br>color/ not applicable                                              | Relevant       | <ul style="list-style-type: none"> <li>Delete “not applicable”</li> </ul>                                                                                                  |
| OHAQ7        | Oral hygiene: bad breath/food debris<br>between teeth                                                                                                  | Relevant       | Add this item for oral hygiene                                                                                                                                             |
| OCPQ1        | Provide explanations to older resident<br>about care during oral care.                                                                                 | Relevant       | Rephrased as “Explain the oral care procedure to the older resident during the procedure.”                                                                                 |
| OCPQ2        | Assist older resident to appropriate<br>position, such as sitting upright with<br>adequate neck support or lying aside for<br>the oral care procedure. | Relevant       | Rephrased as “Position the older resident properly during oral care procedures such as sitting upright with adequate neck support or lying aside if no contraindications.” |
| OCPQ3        | Ensure visibility of oral condition for<br>accessibility for oral care and oral<br>assessment.                                                         | Relevant       | Rephrased as “Ensure the oral cavity is visible under appropriate lighting for oral care and assessment.”                                                                  |
| OCPQ4        | Perform initial oral health assessment.                                                                                                                | Relevant       | Add (Please complete the oral health assessment section)                                                                                                                   |
| OCPQ5        | Place protective sheet under the chin or<br>the face for the resident.                                                                                 | Relevant       | Moved after OCPQ3                                                                                                                                                          |
| OCPQ6        | Have oral care equipment ready, such as<br>toothbrush with toothpaste, dental floss,<br>spongy sticks for oral care.                                   | Relevant       | Rephrased as “Prepare the equipment for oral care aids such as toothbrushes, toothpaste, interdental cleaning aids, and spongy sticks for oral care and cleaning.”         |
| OCPQ7        | Perform oral care thoroughly.                                                                                                                          | Relevant       | Rephrased as “Perform oral care thoroughly, including tongue, teeth, gum, oral membrane, and lips, and apply lip moisturizer if appropriate.”                              |

|        |                                                                                       |          |                                                                                                  |
|--------|---------------------------------------------------------------------------------------|----------|--------------------------------------------------------------------------------------------------|
| OCPQ8  | Observe abnormalities during care such as pain and bleeding.                          | Relevant | Rephrased as "Observe any abnormality during the oral care procedure such as pain and bleeding." |
| OCPQ9  | Ensure safety during oral care.                                                       | Relevant | Rephrased as "Ensure the safety of the resident and the healthcare provider during oral care."   |
| OCPQ10 | Use standard precautions and appropriate infection control measures during oral care. | Relevant | Moved to OCPQ2                                                                                   |
| OCPQ11 | Tidy up after care                                                                    | Relevant | Rephrased as "Tidy up after oral care."                                                          |
| OCPQ12 | Remove dentures if present.                                                           | Relevant | Added this item to increase applicability                                                        |
| OCPQ13 | Report any oral abnormalities immediately to the in charge                            | Relevant | Added this item to increase applicability                                                        |
| OCPQ14 | Document all the assessments and care                                                 | Relevant | Added this item to increase applicability                                                        |

NOTE: Number of items considered relevant and included by all experts, n = 6.

Table S2. The CVI and CVR results

| Question No. | Item Questions                                                                                                                                                             | CVR  | Recommendations | I-CVI | Interpretation | Recommendations |
|--------------|----------------------------------------------------------------------------------------------------------------------------------------------------------------------------|------|-----------------|-------|----------------|-----------------|
| OHAQ1        | Lips:<br>redness/pale/pain/dryness/<br>crusting/chapped/enlarge-<br>ment/irregularities/ulcer/<br>blister/bleeding                                                         | 1.00 | Included        | 1.00  | Relevant       | Included        |
| OHAQ2        | Tongue:<br>redness/pale/discoloration/<br>pain/dryness/smoothness/<br>enlargement/irregularities/<br>ulcer/blister/bleeding                                                | 1.00 | Included        | 1.00  | Relevant       | Included        |
| OHAQ3        | Oral mucosa:<br>redness/pale/pain/dryness/<br>bleeding/ulcer/outgrowth                                                                                                     | 1.00 | Included        | 1.00  | Relevant       | Included        |
| OHAQ4        | Gum:<br>redness/pale/pain/dryness/<br>bleeding/ulcer/enlargement                                                                                                           | 1.00 | Included        | 1.00  | Relevant       | Included        |
| OHAQ5        | Tooth: count<br>(>20/<20/<10/nil)/<br>tartar/deposits/plaque/<br>looseness/discomfort/pain/<br>cavity/caries/severe<br>wear/failing restoration                            | 1.00 | Included        | 1.00  | Relevant       | Included        |
| OHAQ6        | Denture(s):<br>tartar/deposits/plaque/<br>severe wear/looseness/<br>discomfort/pain/poor color/<br>not applicable                                                          | 1.00 | Included        | 1.00  | Relevant       | Included        |
| OHAQ7        | Oral hygiene: bad<br>breath/food debris between<br>teeth                                                                                                                   | 1.00 | Included        | 1.00  | Relevant       | Added           |
| OCPQ1        | Explain the oral care<br>procedure to the older<br>resident during the<br>procedure.                                                                                       | 1.00 | Included        | 1.00  | Relevant       | Included        |
| OCPQ2        | Use standard precaution<br>and appropriate infection<br>control measures during<br>oral care procedures.                                                                   | 1.00 | Included        | 1.00  | Relevant       | Included        |
| OCPQ3        | Position the older resident<br>properly during oral care<br>procedures such as sitting<br>upright with adequate neck<br>support or lying aside if no<br>contraindications. | 1.00 | Included        | 1.00  | Relevant       | Included        |
| OCPQ4        | Place a protective sheet<br>under the older resident's<br>chin or the face.                                                                                                | 1.00 | Included        | 1.00  | Relevant       | Included        |
| OCPQ5        | Ensure the oral cavity is<br>visible under appropriate<br>lighting for oral care and<br>assessment.                                                                        | 1.00 | Included        | 1.00  | Relevant       | Included        |
| OCPQ6        | Perform initial oral health<br>assessment. (Please<br>complete the oral health<br>assessment section)                                                                      | 1.00 | Included        | 1.00  | Relevant       | Included        |
| OCPQ7        | Prepare the equipment for<br>oral care aids such as<br>toothbrushes, toothpaste,<br>interdental cleaning aids,                                                             | 1.00 | Included        | 1.00  | Relevant       | Included        |

|        |                                                                                                                                |      |          |      |          |          |
|--------|--------------------------------------------------------------------------------------------------------------------------------|------|----------|------|----------|----------|
|        | and spongy sticks for oral care and cleaning.                                                                                  |      |          |      |          |          |
| OCPQ8  | Remove dentures if present.                                                                                                    | 1.00 | Included | 1.00 | Relevant | Added    |
| OCPQ9  | Perform oral care thoroughly, including tongue, teeth, gum, oral membrane, and lips, and apply lip moisturizer if appropriate. | 1.00 | Included | 1.00 | Relevant | Included |
| OCPQ10 | Observe any abnormality during the oral care procedure such as pain and bleeding.                                              | 1.00 | Included | 1.00 | Relevant | Included |
| OCPQ11 | Ensure the safety of the resident and the healthcare provider during oral care.                                                | 1.00 | Included | 1.00 | Relevant | Included |
| OCPQ12 | Tidy up after oral care.                                                                                                       | 1.00 | Included | 1.00 | Relevant | Included |
| OCPQ13 | Report any oral abnormalities immediately to the in charge.                                                                    | 1.00 | Included | 1.00 | Relevant | Added    |
| OCPQ14 | Document all the assessments and care.                                                                                         | 1.00 | Included | 1.00 | Relevant | Added    |

NOTE: Number of experts evaluated the item essential.  $CVR = (N_e - N/2)/(N/2)$  with 6 experts ( $n = 6$ ), items with the CVR bigger than 0.99 remained in the questionnaire.

**Table S3 Assessment tool for oral health and oral care procedures**

**Part I. Oral Health Assessment**

| Assessment Items | Please circle the appropriate box<br>(you can circle more than one item) |                              |                           |                            |                             |                          | Describe your circle item(s) if any |
|------------------|--------------------------------------------------------------------------|------------------------------|---------------------------|----------------------------|-----------------------------|--------------------------|-------------------------------------|
| 1. Lips          | Normal (Pink)                                                            | Redness/ pale                | Pain                      | Dryness/ crusting/ chapped | Enlargement/ irregularities | Ulcer/ blister/ bleeding |                                     |
| 2. Tongue        | Normal (Pink)                                                            | Redness/ pale/ discoloration | Pain                      | Dryness/ smoothness        | Enlargement/ irregularities | Ulcer/ bleeding          |                                     |
| 3. Oral mucosa   | Normal (Pink)                                                            | Redness/ pale                | Pain                      | Dryness                    | Bleeding                    | Ulcer/ outgrowth         |                                     |
| 4. Gum           | Normal (Pink)                                                            | Redness/ pale                | Pain                      | Dryness                    | Bleeding                    | Ulcer/ enlargement       |                                     |
| 5. Teeth         | Normal & Count >20                                                       | Count: <20/ <10/ nil         | Tartar/ deposits          | Plaque                     | Looseness                   | Discomfort/ Pain         |                                     |
|                  |                                                                          | Cavity/ caries               | Severe wear               | Failing restoration        |                             |                          |                                     |
| 6. Denture(s)    | Normal <sup>‡</sup>                                                      | Tartar/ deposits             | Plaque                    | Severe wear                | Looseness                   | Discomfort/ Pain         |                                     |
|                  |                                                                          | Poor color                   |                           |                            |                             |                          |                                     |
| 7. Oral hygiene  | Good                                                                     | Bad breath                   | Food debris between teeth |                            |                             |                          |                                     |

<sup>‡</sup>Older residents reported daily use of dentures to eat and speak; and denture(s) fits reasonably well in the mouth and does(do) not appear to be faulty/defective.

Need to see a dentist:    No      Yes

Dentist to be referred:

\_\_\_\_\_

Appointment  
booked on:

\_\_\_\_\_

Staff name & signature:

\_\_\_\_\_

Date:

\_\_\_\_\_

**Part II. Assessment of Oral Care Practice of Healthcare Workers to An Older Resident**

| No. | Items                                                                                                                                                                                                                                                                       | Unsatisfactory | Satisfactory | Not done | Remarks |
|-----|-----------------------------------------------------------------------------------------------------------------------------------------------------------------------------------------------------------------------------------------------------------------------------|----------------|--------------|----------|---------|
| 1   | Explain the oral care procedure to the older resident during the procedure.                                                                                                                                                                                                 |                |              |          |         |
| 2   | Use standard precaution and appropriate infection control measures during oral care procedure.                                                                                                                                                                              |                |              |          |         |
| 3   | Position the older resident properly during oral care procedure such as sitting upright with adequate neck support or lying aside if no contraindications.                                                                                                                  |                |              |          |         |
| 4   | Maintain communication with the older resident during the procedure.                                                                                                                                                                                                        |                |              |          |         |
| 5   | Place a protective sheet under the older resident's chin or the face.                                                                                                                                                                                                       |                |              |          |         |
| 6   | Ensure the oral cavity is visible under appropriate lighting for oral care and assessment.                                                                                                                                                                                  |                |              |          |         |
| 7   | Perform initial oral health assessment.<br><br>(Please complete the oral health assessment form)                                                                                                                                                                            |                |              |          |         |
| 8   | Prepare the equipment for oral care aids such as toothbrushes, toothpaste, interdental cleaning aids, and spongy sticks for oral care and cleaning.                                                                                                                         |                |              |          |         |
| 9   | Remove denture(s) if present and provide appropriate denture hygiene and care.<br><br>(Removed denture(s) during oral hygiene assessment shall be cleaned by a soft bristle toothbrush with mild soap solution, thoroughly rinsed before reinserted into mouth afterwards.) |                |              |          |         |
| 10  | Perform oral care thoroughly, including cleaning the soft tissues (tongue, gum, oral membrane, and lips), and brushing/ flossing the teeth, wiping the soft tissue with a moist gauze, and apply lip moisturizer if appropriate.                                            |                |              |          |         |

|    |                                                                                          |  |  |  |  |
|----|------------------------------------------------------------------------------------------|--|--|--|--|
| 11 | Observe any abnormality during the oral care procedure such as pain and bleeding.        |  |  |  |  |
| 12 | Ensure the safety of the resident and the healthcare provider during oral care.          |  |  |  |  |
| 13 | Tidy up after oral care.                                                                 |  |  |  |  |
| 14 | Provide brief education and/or oral condition to the older resident after the procedure. |  |  |  |  |
| 15 | Report any oral abnormalities immediately to the in charge.                              |  |  |  |  |
| 16 | Document all the assessments and care.                                                   |  |  |  |  |

Overall comments:

---



---



---

Name of responsible staff: \_\_\_\_\_ Signature of responsible staff: \_\_\_\_\_

Name of assessor (if applicable): \_\_\_\_\_ Signature of assessor (if applicable): \_\_\_\_\_

Date and Time: \_\_\_\_\_
